# Supplementary material for: Exploring perceptions of cannabis use and employment implications among healthcare workers: a single-institution experience
Source: J Cannabis Res. 2026 Feb 6;8:36. doi: 10.1186/s42238-026-00399-8 (PMC12973884; doi:10.1186/s42238-026-00399-8)
Supplement: Supplementary file 2 — Supplementary Material 2: Cannabis Survey Data. [file 42238_2026_399_MOESM2_ESM.xlsx]

## Sheet: Question 1
Please identify your role in graduate medical education.
Answer Choices	Responses
Resident or Fellow	0.4	32
Faculty (any status)	0.4375	35
Administrative Staff	0.15	12
Other (please specify)	0.0125	1
	Answered	80
	Skipped	0
		Other (please specify)
		Program Support

## Sheet: Question 2
Were you asked to complete a pre-employment drug screen during the hiring process?
Answer Choices	Responses
Yes	0.7	56
No	0.0875	7
I don't remember	0.225	18
	Answered	80
	Skipped	0

## Sheet: Question 3
To your knowledge, is marijuana included in the drug screen for pre-employment intake at HonorHealth?
Answer Choices	Responses
Yes	0.5375	43
No	0	0
Unsure	0.4625	37
	Answered	80
	Skipped	0

## Sheet: Question 4
To your knowledge, a positive urine drug screen (UDS) for marijuana at HonorHealth can lead to a loss of employment.
Answer Choices	Responses
True	0.5897	46
False	0.0641	5
Unsure	0.359	28
	Answered	78
	Skipped	2

## Sheet: Question 5
To your knowledge, a positive urine drug screen for marijuana at HonorHealth can result in rescinding a pre-employment offer.
Answer Choices	Responses
True	0.6026	47
False	0.0513	4
Unsure	0.3462	27
	Answered	78
	Skipped	2

## Sheet: Question 6
How would you rate your knowledge of marijuana and cannabis products?
Answer Choices	Responses
Extremely familiar	0.1026	8
Very familiar	0.1026	8
Somewhat familiar	0.5513	43
Not so familiar	0.1795	14
Not at all familiar	0.0769	6
	Answered	78
	Skipped	2

## Sheet: Question 7
To your knowledge, marijuana use is medically legal in Arizona.
Answer Choices	Responses
Yes	0.9872	77
No	0	0
Unsure	0.0128	1
	Answered	78
	Skipped	2

## Sheet: Question 8
To your knowledge, marijuana use is recreationally legal in Arizona.
Answer Choices	Responses
True	0.9103	71
False	0.0256	2
Unsure	0.0641	5
	Answered	78
	Skipped	2

## Sheet: Question 9
To your knowledge, marijuana use is federally legal.
Answer Choices	Responses
True	0.0649	5
False	0.8701	67
Unsure	0.0649	5
	Answered	77
	Skipped	3

## Sheet: Question 10
To your knowledge, CBD, a cannabinoid of marijuana, creates a euphoric effect.
Answer Choices	Responses
True	0.0769	6
False	0.7436	58
Unsure	0.1795	14
	Answered	78
	Skipped	2

[truncated: 22 more sheets: Question 11, Question 12, Question 13, Question 14, Question 15, Question 16, Question 17, Question 18, Question 19, Question 20, Question 21, Question 22, Question 23, Question 24, Question 25, Question 26, Question 27, Question 28, Question 29, Question 30 …]
